# Supplementary material
Source: MDPI journal article supplement (https://www.mdpi.com/2311-5637/10/2/103)
Supplement: s1 [file s1]

Archive with 1 entries (1 files):
- fermentation-2809151-supplementary.pdf
